# Supplementary material for: Solvation structures of calcium and magnesium ions in water with the presence of hydroxide: a study by deep potential molecular dynamics
Source: Royal Society of Chemistry journal article supplement (doi:10.1039/d2cp04105g), 2022-11-30
Supplement: d2cp04105g1.pdf [file d2cp04105g1.pdf]

# Solvation Structure of Calcium and Magnesium Ions in Water with the Presence of Hydroxide: a Study by Deep Potential Molecular Dynamics

Jianchuan Liu <sup>a</sup>, Renxi Liu <sup>a, b</sup>, Yu Cao <sup>a</sup>, and Mohan Chen <sup>a, b, \*</sup>

<sup>a</sup>HEDPS, CAPT, College of Engineering and School of Physics, Peking University, Beijing, 100871, China.

<sup>b</sup>Academy for Advanced Interdisciplinary Studies, Peking University, Beijing, 100871, China.

\* Corresponding author. Email: [mohanchen@pku.edu.cn](mailto:mohanchen@pku.edu.cn)

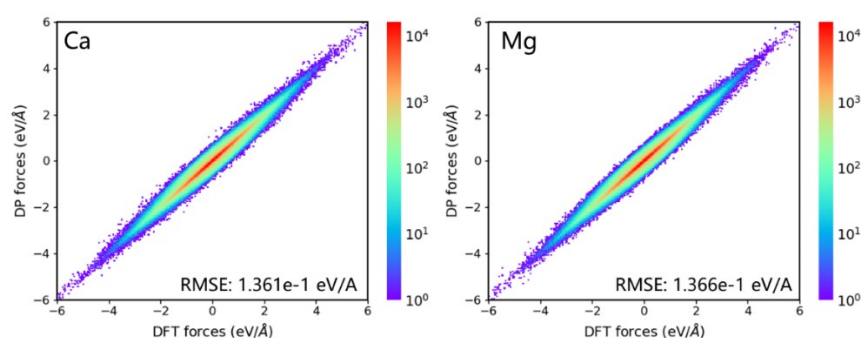

**Figure S1.** Correlation between atomic forces as predicted by the Deep Potential (DP) model and that calculated by Density Functional Theory (DFT) in the final training set. The color bar indicates the density of data.

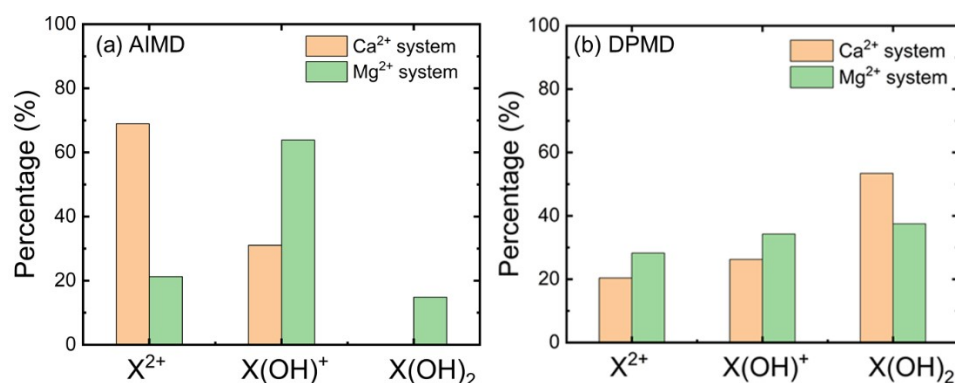

**Figure S2.** Relative concentrations of X<sup>2+</sup>, X(OH)<sup>+</sup> and X(OH)<sub>2</sub> (X=Ca<sup>2+</sup>, Mg<sup>2+</sup>) from (a) *ab initio* molecular dynamics (AIMD) simulations and (b) DP molecular dynamics (DPMD) simulations. The different species have been defined by the number of OH<sup>-</sup> ions in the first solvation shell of X<sup>2+</sup>.

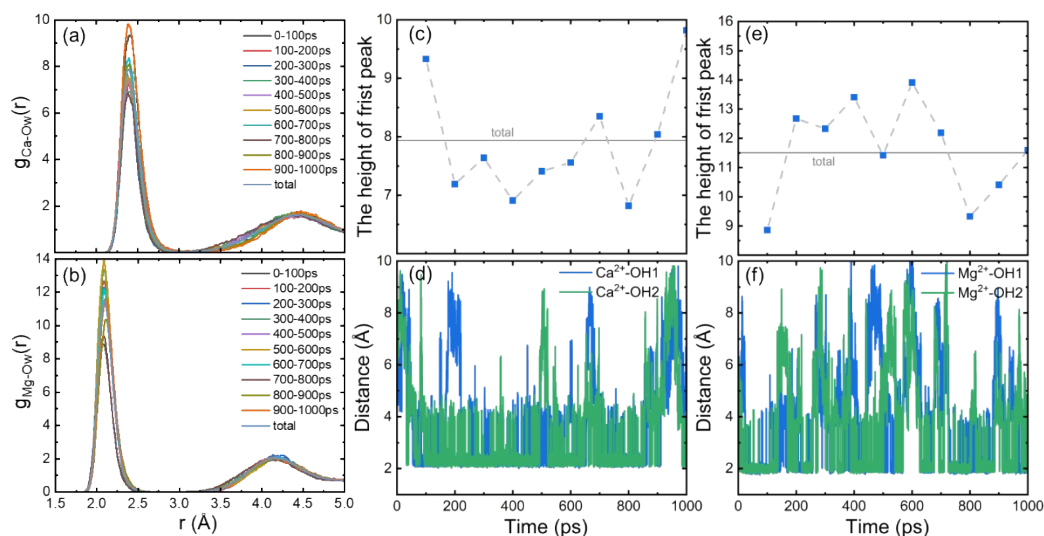

**Figure S3.** The 1-ns DPMD trajectories are equally divided into 10 slices. (a) and (b) show the radial distribution functions  $g(r)$  of the slices of  $\text{Ca}^{2+}$ - $\text{O}_w$  and  $\text{Mg}^{2+}$ - $\text{O}_w$  ( $\text{O}_w$  represents the O atoms in a water molecule), respectively. We find that the height of the first peak changes with the simulation time, as shown in (c) and (e). However, the position of the RDF peak does not change over the simulation time. (d) and (f) show the distance between the  $\text{Ca}^{2+}/\text{Mg}^{2+}$  cation and the two  $\text{OH}^-$  ions in the aqueous solution over the 1-ns simulation time of DPMD, where we find that the height of the first peak changes with the distance between the cation and  $\text{OH}^-$ , i.e., the number of water molecules around the cation decreases when  $\text{OH}^-$  is near the cation.

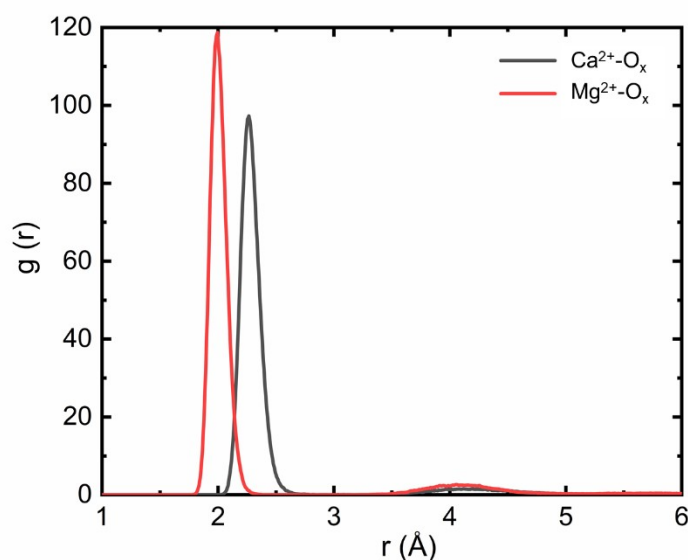

**Figure S4.** The radial distribution functions  $g(r)$  of the  $\text{Ca}^{2+}$ - $\text{O}_x$  and  $\text{Mg}^{2+}$ - $\text{O}_x$  ( $\text{O}_x$  denote the oxygen atom of  $\text{OH}^-$ ) as obtained from 1 ns DPMD simulations.

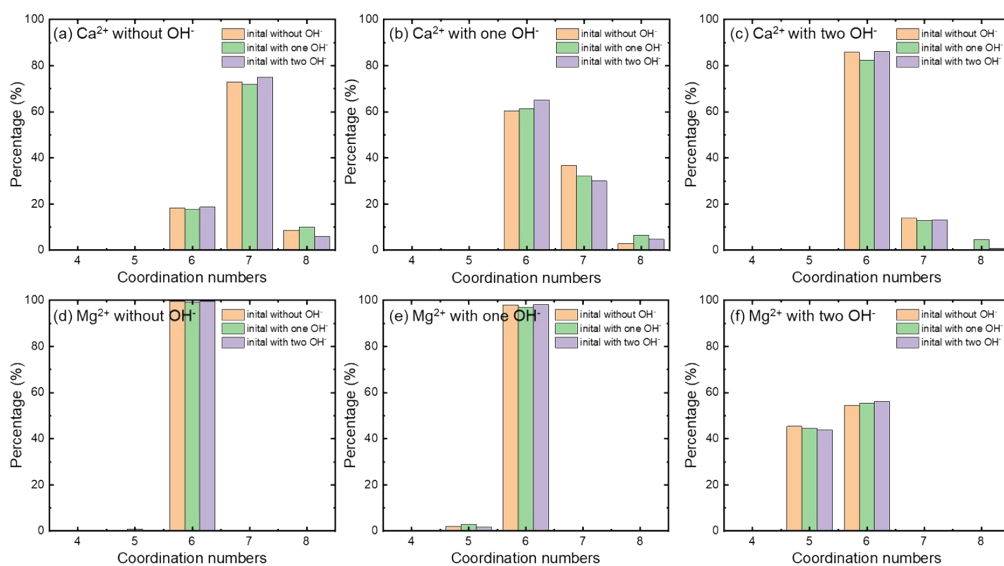

**Figure S5.** Probability distributions of the coordination numbers of the first coordination shells of (a)-(c) Ca<sup>2+</sup> and (d)-(f) Mg<sup>2+</sup> calculated from 1-ns DPMD trajectories. In detail, the distribution of coordination numbers for configurations of Ca<sup>2+</sup>/Mg<sup>2+</sup> without OH<sup>-</sup> in the first solvation shell, Ca<sup>2+</sup>/Mg<sup>2+</sup> with one OH<sup>-</sup> in the first solvation shell, and Ca<sup>2+</sup>/Mg<sup>2+</sup> with two OH<sup>-</sup> in the first solvation shell are illustrated in (a)/(d), (b)/(e), and (c)/(f), respectively. In each figure, we plot the distribution of coordination numbers with three different initial configurations in the DPMD trajectories, i.e., the cation ion without OH<sup>-</sup> in the first solvation shell (orange), the cation ion with one OH<sup>-</sup> in the first solvation shell (green), and the cation ion with two OH<sup>-</sup> in the first solvation shell (purple).

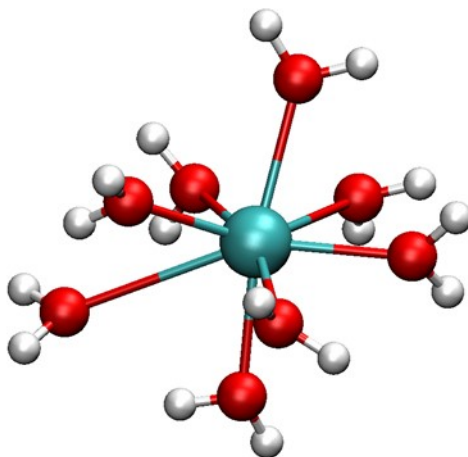

**Figure S6.** Representative solvation structure of Ca<sup>2+</sup> with 8 water molecules. The solvation shell of Ca<sup>2+</sup> tends to form a dodecahedron structure.

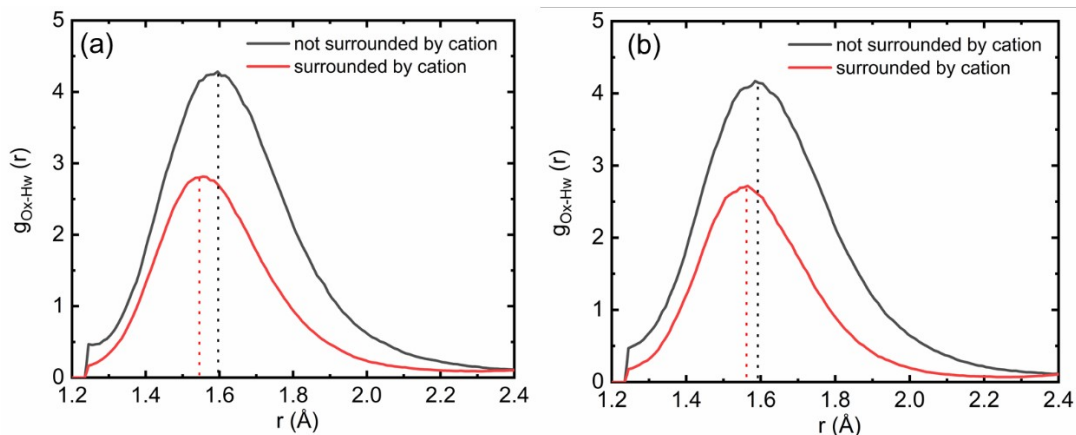

**Figure S7.** The radial distribution functions  $g(r)$  of  $O_x-H_w$  of the  $OH^-$  ion in the (a)  $Ca^{2+}$  and (b)  $Mg^{2+}$  aqueous solutions from the 1-ns DPMD trajectories, where  $O_x$  and  $H_w$  denote the oxygen atom of  $OH^-$  and hydrogen atoms of water molecules,  $g(r)$  for the two cases are considered: the  $OH^-$  ion is not surrounded by  $Ca^{2+}$  or  $Mg^{2+}$ , and the  $OH^-$  ion is surrounded by  $Ca^{2+}$  or  $Mg^{2+}$ . In general, we find the distance between  $O_x$  and  $H_w$  is shorter when  $OH^-$  is present in the first solvation shell of cations.

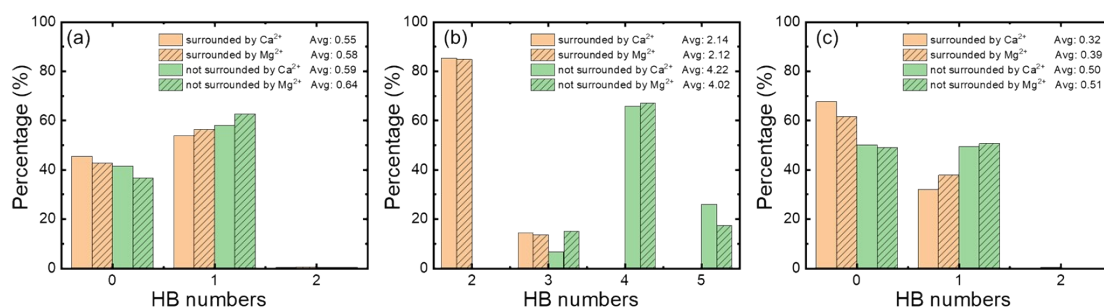

**Figure S8.** (a) Percentages of H-bonds (HBs) donated by  $OH^-$  from the 1-ns DPMD trajectories. (b) Percentages of HBs accepted by  $OH^-$  from the 100-ps AIMD trajectories, and (c) Percentages of HBs donated by  $OH^-$  from the 100-ps AIMD trajectories. The average (Avg) numbers of HBs are shown.
